# Supplementary material
Source: PubMed Central journal article supplement (PMC9525284)

**Fig 1a**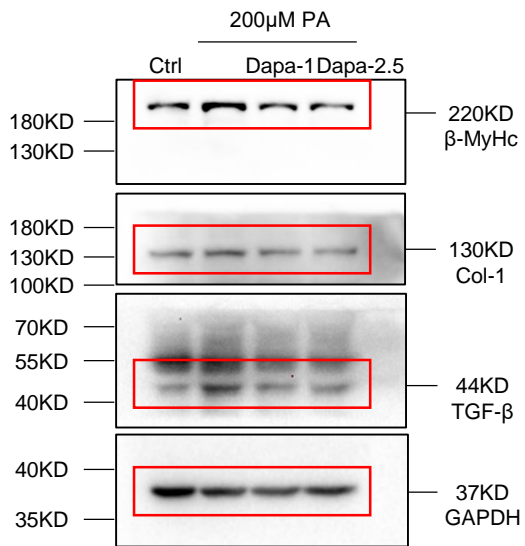**Fig 1d**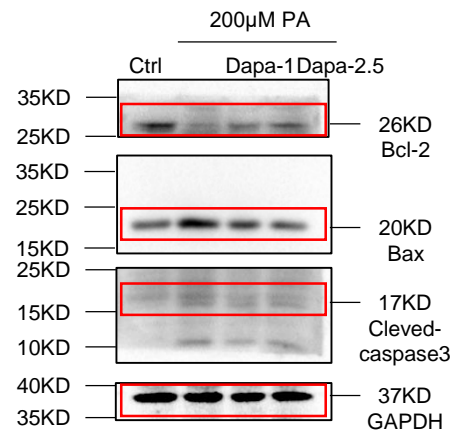**Fig 3b**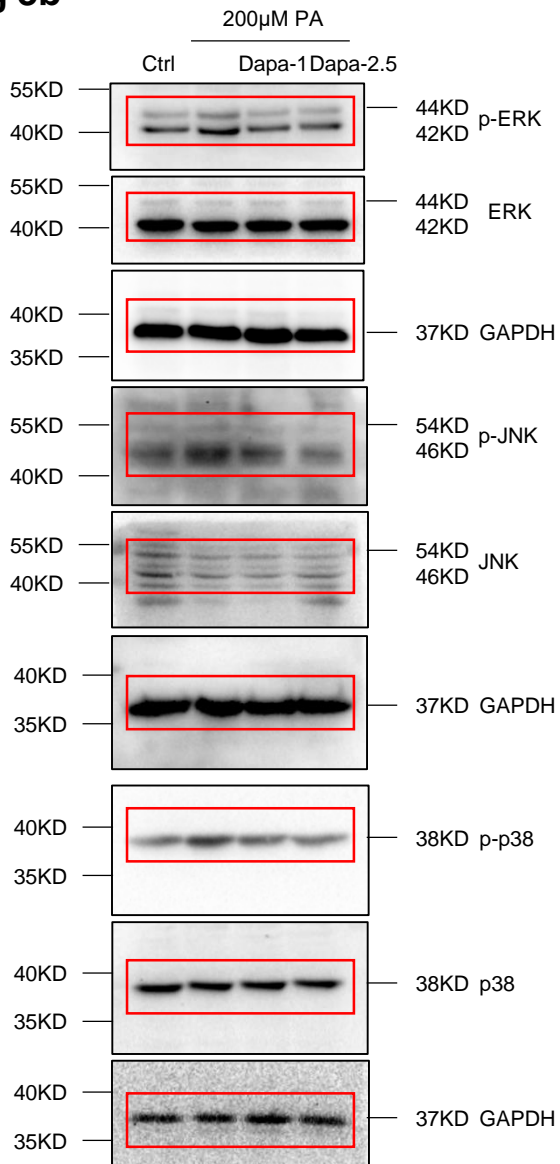

**Fig 4c**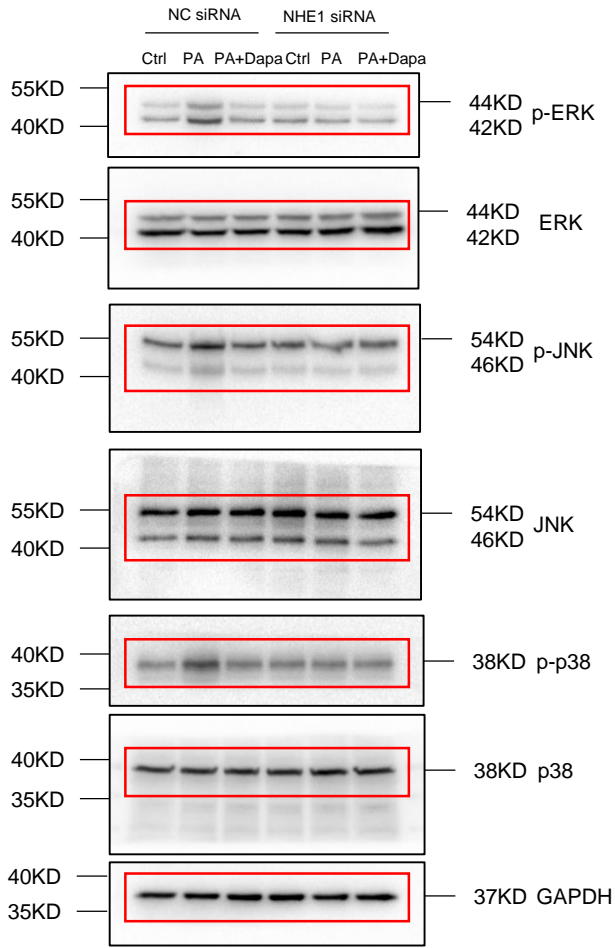**Fig 4d**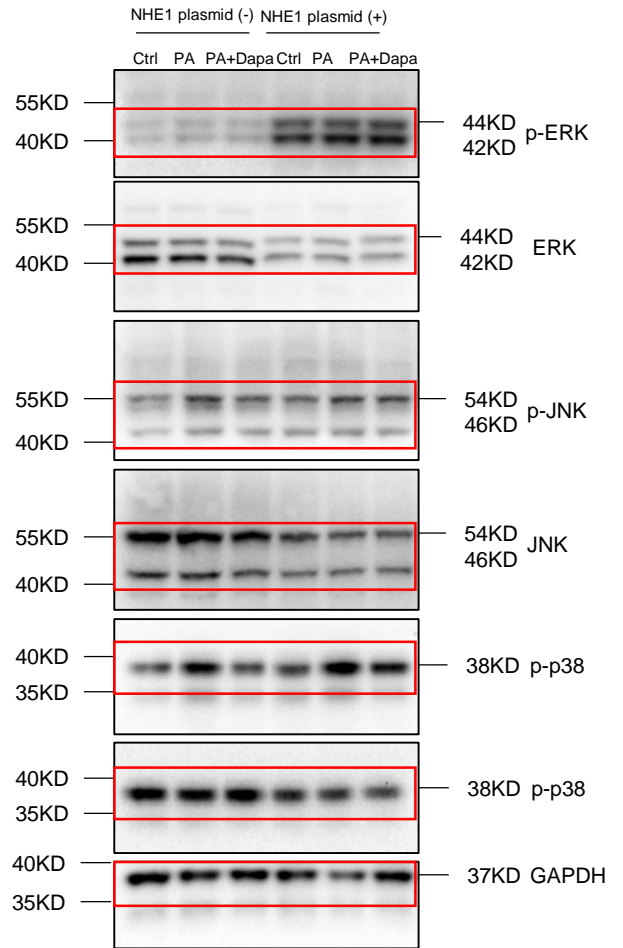**Fig 5g**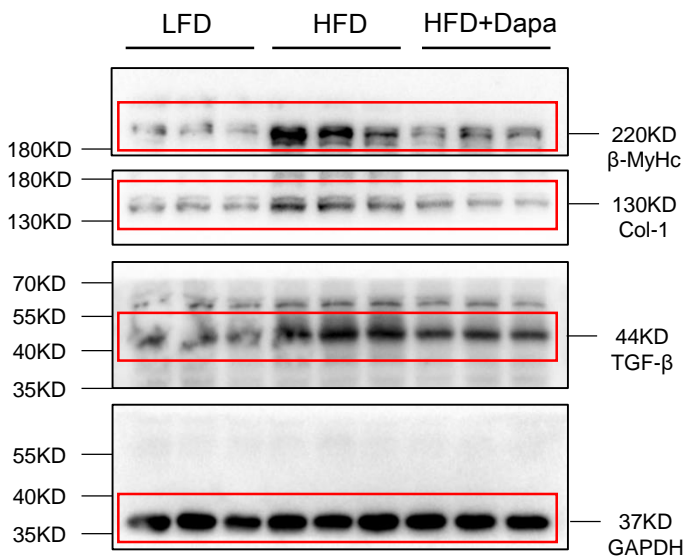**Fig 5i**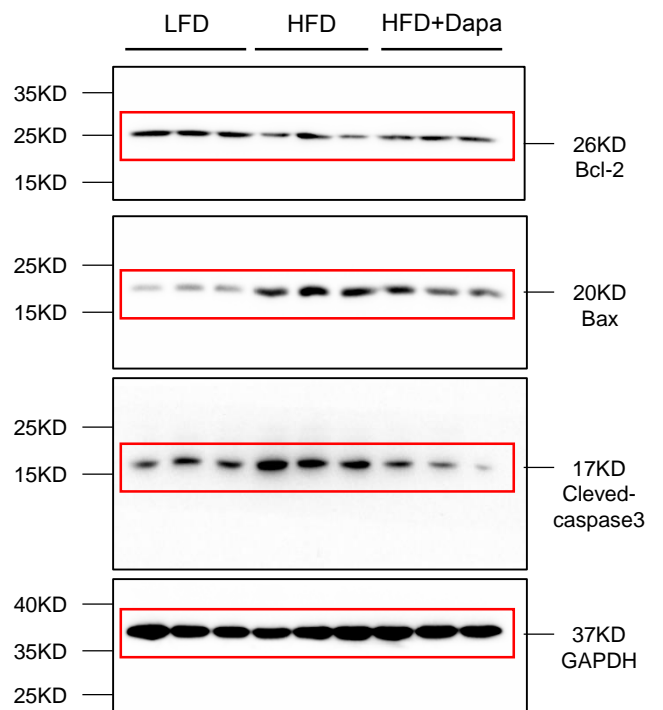

**Fig 6a**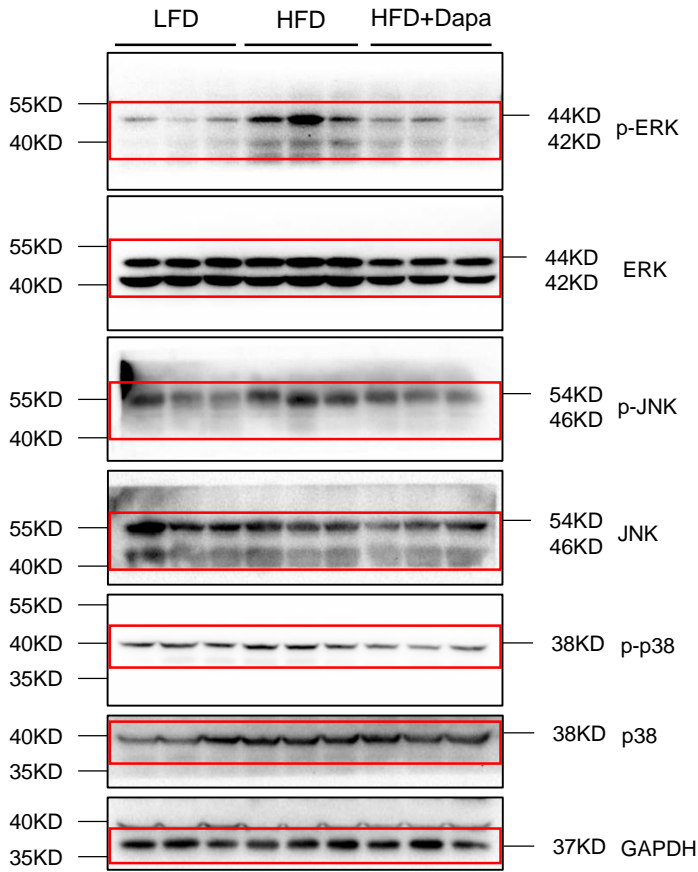**Fig S1a**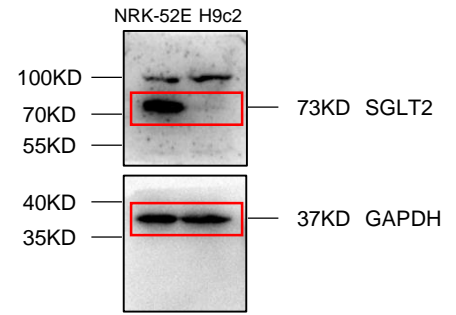**Fig S1b**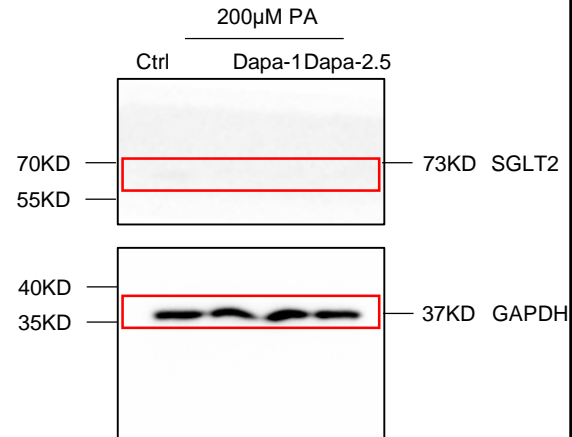**Fig S3**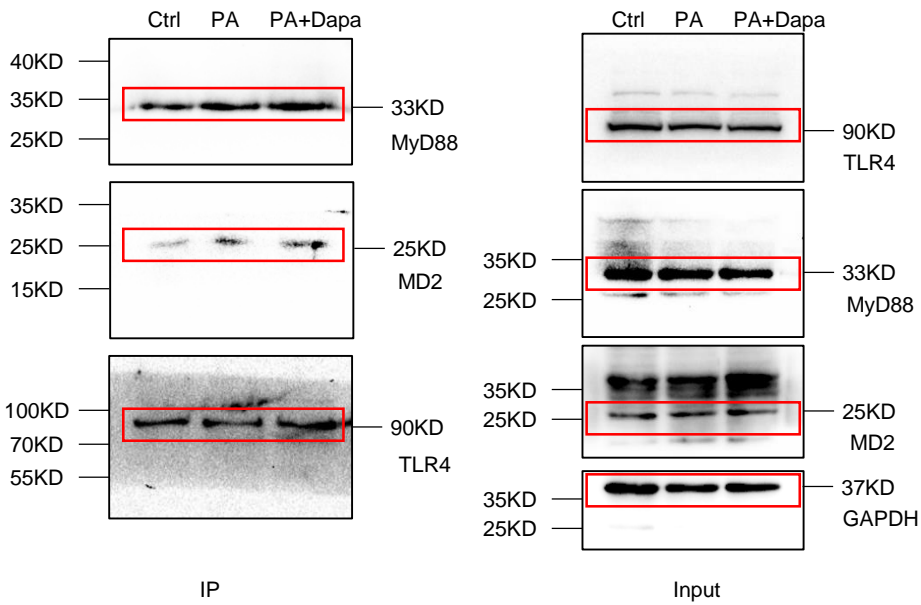**Fig S8**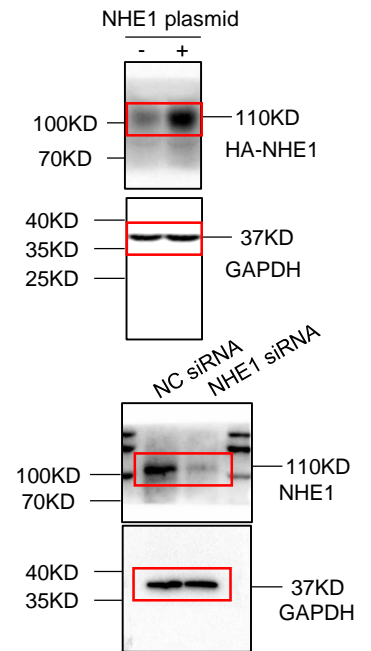

Supplement: 41401_2022_885_MOESM2_ESM.pdf [file 41401_2022_885_MOESM2_ESM.pdf]
